# Supplementary material for: Simultaneous determination of 18 steroids in the hypothalamic pituitary gonadal axis based on UPLC-MS/MS with multimode ionization
Source: Royal Society of Chemistry journal article supplement (doi:10.1039/d4an00524d), 2024-01-01
Supplement: d4an00524d1.pdf [file d4an00524d1.pdf]

## Supporting informations

**Text S1** Mass spectrometry conditions

**Text S2** Sample collection and preparation

**Table S1** The CAS and item number of steroid hormone standards

**Table S2** The gradient elution procedure for the separation of multiple steroid hormones

**Table S3** The MRM parameters of multiple steroid hormones

**Table S4** Effect of different extractants on the extraction yield of steroid hormones

**Table S5** The specificity of multiple steroid hormones

**Table S6** The matrix effect of multiple steroid hormones

**Table S7** The linearity, limit of detection and limit of quantification of multiple steroid hormones

**Table S8** Comparison of parameters of studies related to steroid detection by UPLC-MS/MS methods

**Fig. S1** Effect of different cone voltage on steroid hormone response

**Fig. S2** Effect of different desolvation temperatures on steroid hormone response

**Fig. S3** The MRM chromatogram of E<sub>2</sub> and T with different mobile phases. 0.1 mM NH<sub>4</sub>F + ACN (green peaks); pure water + ACN (red peaks)

**Fig.S4** LC-MS chromatograms of the 18 steroids at LLOQ included in the method.

### **Text S1 Mass spectrometry conditions**

A, E<sub>1</sub>, 2-MeE<sub>2</sub>, E<sub>2</sub>, E<sub>1</sub>-d<sub>2</sub>, and E<sub>1</sub>-d<sub>2</sub> were detected in negative ion mode with the following parameters: capillary voltage, -1.5 kV; desolvation gas flow, 800 L/h; cone gas flow, 150 L/h; desolvation temperature, 550 °C. T-2,3,4-<sup>13</sup>C<sub>3</sub>, 17α-OHP-d<sub>8</sub>, P<sub>4</sub>-2,3,4-<sup>13</sup>C<sub>3</sub>, A<sub>2</sub>-2,3,4-<sup>13</sup>C<sub>3</sub>, E, F, 21-DF, B, 11-DF, 21-OHP, 17α-OHP, DHT, A<sub>2</sub>, T, CH, CH-d<sub>7</sub>, 17α-OHP, P<sub>4</sub>, P<sub>5</sub>, and DHEA were detected by in positive ion mode with the following parameters: capillary voltage, 1.5 kV; desolvation gas flow, 800 L/h; cone gas flow, 50 L/h; corona needle voltage, 21 μA; source temperature, 150 °C and desolvation temperature, 550 °C. IntelliStart was used for optimization of the cone voltages and collision energies.

## **Text S2 Sample collection and preparation**

Blood samples were obtained from *M. musculus* by puncture of the ophthalmic plexus and from *C. auratus* and *R. nigromaculata* by puncture of the cardiac vein. The blood was centrifuged at 1300 rpm for 15 min to obtain serum. The serum was clarified, freed of hemolysis and lipids, and stored frozen at  $-80\text{ }^{\circ}\text{C}$ . This work was conducted in compliance with the ‘Animal Research: Reporting of In Vivo Experiments’ (ARRIVE) guidelines and was approved by the Laboratory Animal Welfare and Ethics Committee of Hangzhou Normal University.

A 100- $\mu\text{L}$  serum sample was mixed with 5  $\mu\text{L}$  stable isotope internal standard (IS), transferred to an Eppendorf tube, and fully equilibrated for 10 min. Subsequently, 10  $\mu\text{L}$  2% FA aqueous solution was added with the aim of addressing the problem of endogenous steroid hormones such as T and  $\text{E}_2$  binding to sex hormone-binding globulins in the organism, resulting in low concentrations for detection. The samples were mixed thoroughly after each addition of reagent. Subsequently, 200  $\mu\text{L}$  methyl tert-butyl ether was added for extraction, and the sample was vortexed for 5 min and then centrifuged at 5000 rpm for 10 min at room temperature. The above liquid–liquid extraction steps were repeated three times, the organic phases were combined, and the collected liquids were blown dry under nitrogen. Finally, 100  $\mu\text{L}$  ACN was added for re-dissolution, filtered through polyether sulfone membrane with a 0.22- $\mu\text{m}$  pore size, and then placed in an autosampler for UPLC–MS/MS analysis.

**Table S1.** The CAS and item number of steroid hormone standards

| Steroid hormone standards                             | CAS         | Item number |
|-------------------------------------------------------|-------------|-------------|
| Cholesterol (CH)                                      | 57-88-5     | C8667       |
| CH-d <sub>7</sub>                                     | 83199-47-7  | 700041P     |
| Androstenedione (A <sub>2</sub> )                     | 63-05-8     | A-075       |
| A <sub>2</sub> -2,3,4- <sup>13</sup> C <sub>3</sub>   | 327048-86-2 | A-084       |
| Estradiol (E <sub>2</sub> )                           | 50-28-2     | E8875       |
| E <sub>2</sub> -d <sub>2</sub>                        | 53866-33-4  | E4260       |
| Estrone (E <sub>1</sub> )                             | 53-16-7     | E-075       |
| 17- $\alpha$ -hydroxy progesterone (17 $\alpha$ -OHP) | 68-96-2     | H-085       |
| Testosterone (T)                                      | 58-22-0     | T-037       |
| Dehydroepiandrosterone (DHEA)                         | 53-43-0     | D-063       |
| Progesterone (P <sub>4</sub> )                        | 57-83-0     | P-069       |
| Pregnenolone (P <sub>5</sub> )                        | 145-13-1    | P-104       |
| Dihydrotestosterone (DHT)                             | 521-18-6    | D-073       |

---

|                                                     |             |          |
|-----------------------------------------------------|-------------|----------|
| T-2,3,4- <sup>13</sup> C <sub>3</sub>               | 327048-83-9 | T-070    |
| 17 $\alpha$ -OHP-d <sub>8</sub>                     | 850023-80-2 | H-096    |
| P <sub>4</sub> -2,3,4- <sup>13</sup> C <sub>3</sub> | 327048-87-3 | 737143   |
| Aldosterone (A)                                     | 52-39-1     | S30644   |
| Cortisone (E)                                       | 53-06-5     | S47960   |
| 11-deoxycortisol (11-DF)                            | 152-58-9    | B27368   |
| 21-hydroxy progesterone (21-OHP)                    | 64-85-7     | B65163   |
| 2-methoxyestrone (2-MeE <sub>2</sub> )              | 362-07-2    | S46451   |
| 21-deoxycortisol (21-DF)                            | 362-07-2    | 641-77-0 |
| E <sub>1</sub> -d <sub>2</sub>                      | 56588-58-0  | B72569   |
| Corticosterone (B)                                  | 50-22-6     | C104537  |
| Hydrocortisone (F)                                  | 50-23-7     | H110523  |

---

**Table S2** The gradient elution procedure for the separation of multiple steroid hormones

| Time (min) | Flow rate (mL/min) | A (%) | B (%) | Gradient elution curve |
|------------|--------------------|-------|-------|------------------------|
| initial    | 0.2                | 70    | 30    | 6                      |
| 3.5        | 0.2                | 40    | 60    | 6                      |
| 8.0        | 0.3                | 10    | 90    | 6                      |
| 8.5        | 0.3                | 0     | 100   | 6                      |
| 10.0       | 0.2                | 70    | 30    | 6                      |

**Table S3** The MRM parameters of multiple steroid hormones

| Steroid hormone                               | Parent ion (m/z) | Cone voltage (V) | Daughter ion (m/z) | CE (eV) | Daughter ion (m/z) | CE (eV) |
|-----------------------------------------------|------------------|------------------|--------------------|---------|--------------------|---------|
| A                                             | 359.09           | 4                | 189.04*            | 18      | 331.13             | 14      |
| E <sub>2</sub>                                | 271.02           | 18               | 145.01*            | 40      | 183.04             | 42      |
| E <sub>2</sub> -d <sub>2</sub>                | 293.16           | 2                | 147.03             | 38      | --                 | --      |
| E                                             | 361.15           | 32               | 91.53              | 64      | 163.02*            | 22      |
| F                                             | 363.14           | 32               | 97.17              | 60      | 121.23*            | 24      |
| 21-DF                                         | 347.17           | 26               | 121.32*            | 28      | 311.18             | 16      |
| B                                             | 347.17           | 28               | 91.43              | 60      | 121.36*            | 26      |
| 11-DF                                         | 347.17           | 30               | 97.35*             | 24      | 109.33             | 30      |
| P <sub>4</sub>                                | 315.27           | 30               | 42.94              | 52      | 109.05*            | 22      |
| P <sub>5</sub>                                | 299.14           | 48               | 81.32*             | 44      | 159.10             | 20      |
| P <sub>4</sub> - <sup>13</sup> C <sub>3</sub> | 318.22           | 26               | 99.81              | 22      | --                 | --      |
| A <sub>2</sub>                                | 287.15           | 38               | 96.95*             | 18      | 108.99             | 22      |
| A <sub>2</sub> - <sup>13</sup> C <sub>3</sub> | 290.17           | 32               | 99.86              | 20      | --                 | --      |
| E <sub>1</sub>                                | 269.15           | 18               | 144.94*            | 40      | 158.93             | 32      |
| 2-MeE <sub>2</sub>                            | 301.11           | 2                | 219.08             | 12      | 286.17*            | 24      |

---

|                                 |        |    |        |    |         |    |
|---------------------------------|--------|----|--------|----|---------|----|
| E <sub>1</sub> -d <sub>2</sub>  | 271.16 | 18 | 145.01 | 42 | --      | -- |
| 21-OHP                          | 331.17 | 32 | 97.39* | 22 | 109.37  | 30 |
| 17-OHP                          | 331.21 | 42 | 96.95* | 22 | 108.98  | 28 |
| 17-OHP-d <sub>8</sub>           | 339.22 | 38 | 99.87  | 28 | --      | -- |
| T                               | 289.20 | 46 | 96.94* | 18 | 108.98  | 20 |
| DHEA                            | 271.20 | 45 | 197.20 | 14 | 213.2*  | 12 |
| DHT                             | 291.19 | 45 | 159.10 | 16 | 255.20* | 14 |
| T- <sup>13</sup> C <sub>3</sub> | 292.18 | 50 | 99.83  | 20 | --      | -- |
| CH                              | 369.18 | 26 | 80.95  | 44 | 146.90* | 20 |
| CH-d <sub>7</sub>               | 376.21 | 20 | 104.93 | 50 | 161.02* | 20 |

---



**Table S4.** Effect of different extractants on the extraction yield of steroid hormones

| Steroid hormone    | Efficiency of extraction (%) |        |                                |
|--------------------|------------------------------|--------|--------------------------------|
|                    | Dichloromethane              | Hexane | Methyl tert-Butyl Ether (MTBE) |
| A                  | 79.7                         | < 50.0 | 87.7                           |
| E                  | 77.1                         | < 50.0 | 91.2                           |
| F                  | 89.3                         | 77.8   | 96.6                           |
| 21-DF              | 83.8                         | 74.8   | 93.8                           |
| B                  | 80.1                         | 75.0   | 91.5                           |
| 11-DF              | 79.8                         | 70.8   | 87.0                           |
| A <sub>2</sub>     | 81.3                         | < 50.0 | 85.2                           |
| E <sub>2</sub>     | 68.0                         | < 50.0 | 84.2                           |
| E1                 | 73.6                         | 66.6   | 84.8                           |
| 2-MeE <sub>1</sub> | 87.8                         | 72.1   | 86.3                           |
| 21-OHP             | 82.5                         | < 50.0 | 82.9                           |
| 17-OHP             | 94.1                         | 80.0   | 97.0                           |
| T                  | 82.3                         | 72.3   | 91.8                           |
| DHEA               | 94.4                         | 72.8   | 112.3                          |

---

|                |      |        |       |
|----------------|------|--------|-------|
| P <sub>4</sub> | 66.7 | < 50.0 | 83.91 |
| DHT            | 76.2 | 51.8   | 88.19 |
| P <sub>5</sub> | 87.8 | < 50.0 | 85.10 |
| CH             | 72.8 | < 50.0 | 89.37 |

---

\* If one depicts the known concentration of standards in as A, the concentration detected by the UPLC-MS/MS for standards spiked after different pretreatment as B. Efficiency of extraction can be calculated as follows:  $B/A \times 100$ .

**Table S5.** The specificity of multiple steroid hormones

| Steroid hormones | Sample                  | Concentration (ng/mL) | QI/QC |        |
|------------------|-------------------------|-----------------------|-------|--------|
|                  |                         |                       | Mean  | Median |
| A                | Calibration solution    | 0.05-50.00            | 1.41  | 1.38   |
|                  | Quality control samples | 0.21-46.43            | 1.40  | 1.41   |
|                  | Serum samples           | 0.29-10.32            | 1.37  | 1.36   |
| E                | Calibration solution    | 0.05-50.00            | 1.69  | 1.65   |
|                  | Quality control samples | 0.18-40.21            | 1.67  | 1.66   |
|                  | Serum samples           | 0.21-8.32             | 1.68  | 1.64   |
| F                | Calibration solution    | 0.05-50.00            | 1.98  | 1.97   |
|                  | Quality control samples | 0.21-42.17            | 1.99  | 1.99   |
|                  | Serum samples           | 0.34-4.43             | 2.00  | 1.99   |
| 21-DF            | Calibration solution    | 0.05-50.00            | 1.78  | 1.77   |
|                  | Quality control samples | 0.15-39.23            | 1.79  | 1.78   |
|                  | Serum samples           | 0.20-5.32             | 1.79  | 1.78   |
| B                | Calibration solution    | 0.05-50.00            | 1.65  | 1.65   |
|                  | Quality control samples | 0.31-39.79            | 1.66  | 1.65   |

|                    |                         |            |      |      |
|--------------------|-------------------------|------------|------|------|
|                    | Serum samples           | 0.37-3.32  | 1.66 | 1.66 |
|                    | Calibration solution    | 0.05-50.00 | 1.34 | 1.34 |
| 11-DF              | Quality control samples | 0.18-42.32 | 1.33 | 1.34 |
|                    | Serum samples           | 0.32-3.32  | 1.34 | 1.35 |
|                    | Calibration solution    | 0.05-50.00 | 1.42 | 1.42 |
| A <sub>2</sub>     | Quality control samples | 0.28-47.02 | 1.42 | 1.42 |
|                    | Serum samples           | 0.29-5.08  | 1.42 | 1.41 |
|                    | Calibration solution    | 0.05-50.00 | 1.21 | 1.20 |
| E <sub>2</sub>     | Quality control samples | 0.14-47.20 | 1.20 | 1.21 |
|                    | Serum samples           | 0.77-32.32 | 1.21 | 1.21 |
|                    | Calibration solution    | 0.05-50.00 | 1.31 | 1.31 |
| E <sub>1</sub>     | Quality control samples | 0.12-42.48 | 1.30 | 1.31 |
|                    | Serum samples           | 0.53-18.30 | 1.31 | 1.31 |
|                    | Calibration solution    | 0.05-50.00 | 1.22 | 1.23 |
| 2-MeE <sub>1</sub> | Quality control samples | 0.11-48.26 | 1.21 | 1.23 |
|                    | Serum samples           | 0.52-3.24  | 1.22 | 1.23 |
| 21-OHP             | Calibration solution    | 0.05-50.00 | 1.14 | 1.16 |

|                  |                         |            |      |      |
|------------------|-------------------------|------------|------|------|
|                  | Quality control samples | 0.18-37.43 | 1.14 | 1.15 |
|                  | Serum samples           | 0.08-18.29 | 1.14 | 1.16 |
|                  | Calibration solution    | 0.05-50.00 | 1.33 | 1.34 |
| 17 $\alpha$ -OHP | Quality control samples | 0.09-39.72 | 1.33 | 1.34 |
|                  | Serum samples           | 0.99-15.47 | 1.33 | 1.35 |
|                  | Calibration solution    | 0.05-50.00 | 1.65 | 1.66 |
| T                | Quality control samples | 0.17-48.28 | 1.65 | 1.66 |
|                  | Serum samples           | 0.72-20.67 | 1.64 | 1.65 |
|                  | Calibration solution    | 0.05-50.00 | 2.51 | 2.53 |
| DHEA             | Quality control samples | 0.14-39.05 | 2.50 | 2.54 |
|                  | Serum samples           | 0.48-20.37 | 2.51 | 2.53 |
|                  | Calibration solution    | 0.05-50.00 | 1.22 | 1.21 |
| P <sub>4</sub>   | Quality control samples | 0.17-37.38 | 1.23 | 1.22 |
|                  | Serum samples           | 0.95-22.26 | 1.23 | 1.22 |
|                  | Calibration solution    | 0.05-50.00 | 2.42 | 2.41 |
| DHT              | Quality control samples | 0.11-48.24 | 2.43 | 2.41 |
|                  | Serum samples           | 0.15-3.57  | 2.43 | 2.41 |

|                |                         |               |      |      |
|----------------|-------------------------|---------------|------|------|
|                | Calibration solution    | 0.05-50.00    | 2.55 | 2.56 |
| P <sub>5</sub> | Quality control samples | 0.13-37.38    | 2.54 | 2.56 |
|                | Serum samples           | 0.37-2.37     | 2.55 | 2.56 |
|                | Calibration solution    | 50-1000.00    | 1.29 | 1.29 |
| CH             | Quality control samples | 108.28-989.82 | 1.27 | 1.28 |
|                | Serum samples           | 382.28-899.27 | 1.27 | 1.28 |

---

**Table S6.** The matrix effect of multiple steroid hormones

| Steroid hormones   | Matrix Effect (n = 5) |                   |                    |
|--------------------|-----------------------|-------------------|--------------------|
|                    | Mean $\pm$ SD (%)     |                   |                    |
|                    | LQC                   | MQC               | HQC                |
| A                  | 97.96 $\pm$ 6.66      | 93.85 $\pm$ 13.33 | 95.71 $\pm$ 7.62   |
| E                  | 91.78 $\pm$ 26.39     | 98.40 $\pm$ 7.99  | 107.34 $\pm$ 9.31  |
| F                  | 99.80 $\pm$ 22.57     | 105.46 $\pm$ 7.78 | 103.88 $\pm$ 2.05  |
| 21-DF              | 98.28 $\pm$ 22.56     | 98.14 $\pm$ 6.57  | 111.06 $\pm$ 11.37 |
| B                  | 86.47 $\pm$ 8.35      | 90.93 $\pm$ 5.98  | 90.53 $\pm$ 3.59   |
| 11-DF              | 89.29 $\pm$ 12.22     | 111.42 $\pm$ 3.66 | 109.77 $\pm$ 12.37 |
| A <sub>2</sub>     | 79.86 $\pm$ 6.69      | 98.93 $\pm$ 2.54  | 93.99 $\pm$ 9.64   |
| E <sub>2</sub>     | 99.83 $\pm$ 8.41      | 84.32 $\pm$ 15.46 | 80.98 $\pm$ 9.18   |
| E <sub>1</sub>     | 95.91 $\pm$ 9.82      | 104.93 $\pm$ 5.58 | 98.19 $\pm$ 28.53  |
| 2-MeE <sub>2</sub> | 90.15 $\pm$ 8.48      | 92.20 $\pm$ 8.65  | 86.74 $\pm$ 10.38  |
| 21-OHP             | 91.26 $\pm$ 9.27      | 93.56 $\pm$ 9.40  | 82.42 $\pm$ 8.75   |
| 17-OHP             | 89.40 $\pm$ 4.17      | 89.68 $\pm$ 6.61  | 90.68 $\pm$ 3.20   |
| T                  | 79.46 $\pm$ 2.69      | 108.12 $\pm$ 3.58 | 98.95 $\pm$ 6.82   |

---

|                |                    |                    |                    |
|----------------|--------------------|--------------------|--------------------|
| DHEA           | $83.79 \pm 11.08$  | $98.61 \pm 5.01$   | $89.36 \pm 13.64$  |
| P <sub>4</sub> | $92.25 \pm 17.37$  | $108.87 \pm 3.82$  | $107.16 \pm 8.07$  |
| DHT            | $102.05 \pm 28.56$ | $107.60 \pm 20.23$ | $100.49 \pm 21.06$ |
| P <sub>5</sub> | $100.84 \pm 13.94$ | $93.28 \pm 14.37$  | $92.61 \pm 15.07$  |
| CH             | $102.78 \pm 17.69$ | $98.43 \pm 4.79$   | $89.31 \pm 6.16$   |

---



**Table S7** The linearity, limit of detection and limit of quantification of multiple steroid hormones

| Steroid hormone    | The standard curve    | $r^2$  | LOD (ng/mL) | LLOQ (ng/mL) |
|--------------------|-----------------------|--------|-------------|--------------|
| A                  | $y = 1.003 x + 1.834$ | 0.9998 | 0.015       | 0.05         |
| E                  | $y = 1.743 x + 0.773$ | 0.9999 | 0.15        | 0.5          |
| F                  | $y = 2.374 x + 1.383$ | 0.9961 | 0.0001      | 0.0005       |
| 21-DF              | $y = 3.839 x + 2.001$ | 0.9993 | 0.005       | 0.02         |
| B                  | $y = 2.328 x + 0.198$ | 0.9912 | 0.05        | 0.2          |
| 11-DF              | $y = 1.023 x + 3.384$ | 0.9994 | 0.015       | 0.05         |
| A <sub>2</sub>     | $y = 3.638 x + 2.100$ | 0.9999 | 0.0005      | 0.002        |
| E <sub>2</sub>     | $y = 1.005 x + 0.478$ | 0.9999 | 0.005       | 0.02         |
| E <sub>1</sub>     | $y = 2.030 x + 0.836$ | 0.9999 | 0.001       | 0.003        |
| 2-MeE <sub>1</sub> | $y = 2.576 x + 0.004$ | 0.9992 | 0.005       | 0.02         |
| 21-OHP             | $y = 3.675 x + 1.464$ | 0.9963 | 0.001       | 0.003        |
| 17 $\alpha$ -OHP   | $y = 1.007 x + 0.552$ | 0.9996 | 0.005       | 0.02         |
| T                  | $y = 1.211 x + 0.668$ | 0.9991 | 0.01        | 0.03         |
| DHEA               | $y = 3.446 x + 1.374$ | 0.9995 | 0.015       | 0.05         |
| P <sub>4</sub>     | $y = 1.098 x + 0.336$ | 0.9999 | 0.005       | 0.02         |

---

|                |                       |        |       |      |
|----------------|-----------------------|--------|-------|------|
| DHT            | $y = 1.102 x + 8.259$ | 0.9982 | 0.025 | 0.08 |
| P <sub>5</sub> | $y = 3.40 x + 8.437$  | 0.9929 | 0.075 | 0.3  |
| CH             | $y = 3.373 x + 0.226$ | 0.9927 | 0.15  | 0.5  |

---

| Number of steroids<br>(Internal standard<br>included) | Serum Sample<br>Required | LLOQ              | Rate of recovery | Detection of CH | References |
|-------------------------------------------------------|--------------------------|-------------------|------------------|-----------------|------------|
| 24                                                    | 200 µL                   | 0.01-12.5 ng/mL   | 88.8%-107.1%     | no              | [1]        |
| 13                                                    | 250 µL                   | 0.05-12.9 ng/mL   | 90.0%-110.0%     | no              | [2]        |
| 16                                                    | 150 µL                   | 0.005-0.164 ng/mL | 88.7%-116.2%     | no              | [3]        |
| 19                                                    | 290 µL                   | 0.004-0.75 ng/mL  | 68.2%-135%       | no              | [4]        |
| 14                                                    | 150 µL                   | 0.001-0.3 nmol/L  | 83.0%-115.0%     | no              | [5]        |
| 10                                                    | /                        | 0.75-2.1 nmol/L   | 86.7%-106.7%     | no              | [6]        |
| 8                                                     | 200 µL                   | 0.015-0.95 ng/mL  | 106.1%-115.7%    | no              | [7]        |
| 22                                                    | 150 µL                   | 0.003-0.33 nmol/L | 83.0%-137.0%     | no              | [8]        |
| 18                                                    | 200 µL                   | 0.005-1 ng/mL     | 85.0%-104.0%     | no              | [9]        |
| 19                                                    | 500 µL                   | 0.04-1.18 ng/mL   | 80.0%-120.0%     | no              | [10]       |
| 9                                                     | 200 µL                   | 0.001-0.1 ng/mL   | /                | no              | [11]       |
| 12                                                    | 100 µL                   | 0.1–500 ng/mL     | 87.0–101.0%      | no              | [12]       |
| 25                                                    | 100 µL                   | 0.0005-0.5 ng/mL  | 76.2%-113.7%     | yes             | This study |

**Table S8** Comparison of parameters of studies related to steroid detection by UPLC-MS/MS methods

**References**

- [1] Yu, S. L., Yin, Y. C., Zou, Y. T., et, al. A comprehensive LC-MS/MS method for the simultaneous measurement of 24 adrenal steroids: From research to clinical practice. *Journal of Chromatography B* 1232 (2024) 123941
- [2] David, R. T., Lea, G., Lewis, C., et, al. A 13-Steroid Serum Panel Based on LC-MS/MS: Use in Detection of Adrenocortical Carcinoma. *Clinical Chemistry* 63(12) (2017) 1836-1846.
- [3] Jean, F., Yves, L. B., Jérôme G., et, al. A Liquid Chromatography/Tandem Mass Spectrometry Profile of 16 Serum Steroids, Including 21-Deoxycortisol and 21-Deoxycorticosterone, for Management of Congenital Adrenal Hyperplasia. *Journal of the Endocrine Society*. 1(3) (2017) 186-201
- [4] Wu, J., Li, Z.H., Chen, B.R. Simultaneous measurement of 19 steroid hormones in dried blood spots using ultra-performance liquid chromatography-tandem mass spectrometry. *Analytical Methods*. 16 (2013)
- [5] Merja, R. H., Taija, H., Niina S., et, al. Analysis by LC-MS/MS of endogenous steroids from human serum, plasma, endometrium and endometriotic tissue. *Journal of Pharmaceutical and Biomedical Analysis*. 152 (2018) 165-172.
- [6] Nils, J., Stefanie, S., Michael, T., et, al. Fast and direct quantification of adrenal steroids by tandem mass spectrometry in serum and dried

blood spots. *Journal of Chromatography B* 861(2008) 117-122.

- [7] Kyriakopoulou, L., Yazdanpanah, M., Colantonio, D.A. A sensitive and rapid mass spectrometric method for the simultaneous measurement of eight steroid hormones and CALIPER pediatric reference intervals. *Clinical Chemistry* 46(7) (2013) 642-651.
- [8] Merja, R.H., Teemu M., Raimo, M., et, al. Simultaneous analysis by LC–MS/MS of 22 ketosteroids with hydroxylamine derivatization and underivatized estradiol from human plasma, serum and prostate tissue. *Journal of Pharmaceutical and Biomedical Analysis*. 164 (2019) 642-652.
- [9] Desai, R., Harwood, D.T., Handelsman, D.J. Simultaneous measurement of 18 steroids in human and mouse serum by liquid chromatography–mass spectrometry without derivatization to profile the classical and alternate pathways of androgen synthesis and metabolism. *Clinical Mass Spectrometry* 11 (2019) 42–5
- [10] Zhong, M.Li., Kurunthachalam K. Determination of 19 steroid hormones in human serum and urine using liquid chromatography-T andem mass spectrometry. *Toxics* 10 (2022) 687.
- [11] Nguyen, V.K., Nguyen, T.H., Nguyen, T.D.T., et.al. Highly Sensitive simultaneous measurement of steroid hormone in human serum by liquid chromatography-electrospray ionization tandem mass spectrometry. *VNU Journal of Science: Medical and Pharmaceutical Sciences*

38(1) (2022) 54-64.

- [12] Lee. K., Ella, S. M. N., Kiran, K.S., Katherine, E.W. Sample Preparation and Liquid Chromatography-Tandem Mass Spectrometry for Multiple Steroids in Mammalian and Avian Circulation. PLoS ONE 7(2) (2012) e32496.

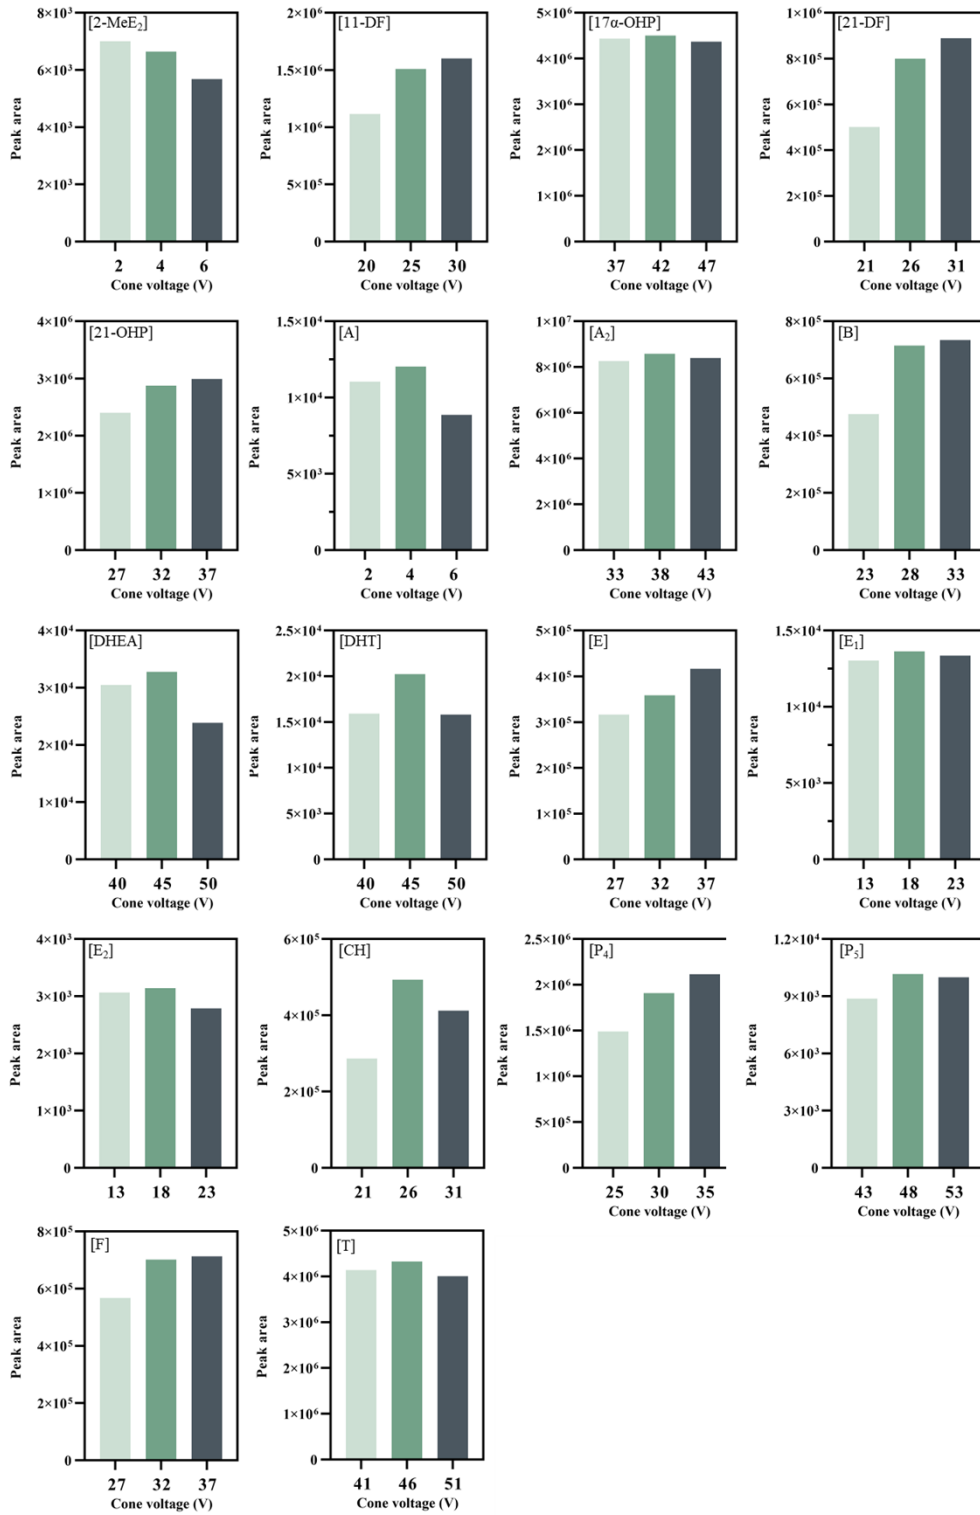

Fig.S1 Effect of different cone voltage on steroid hormone response

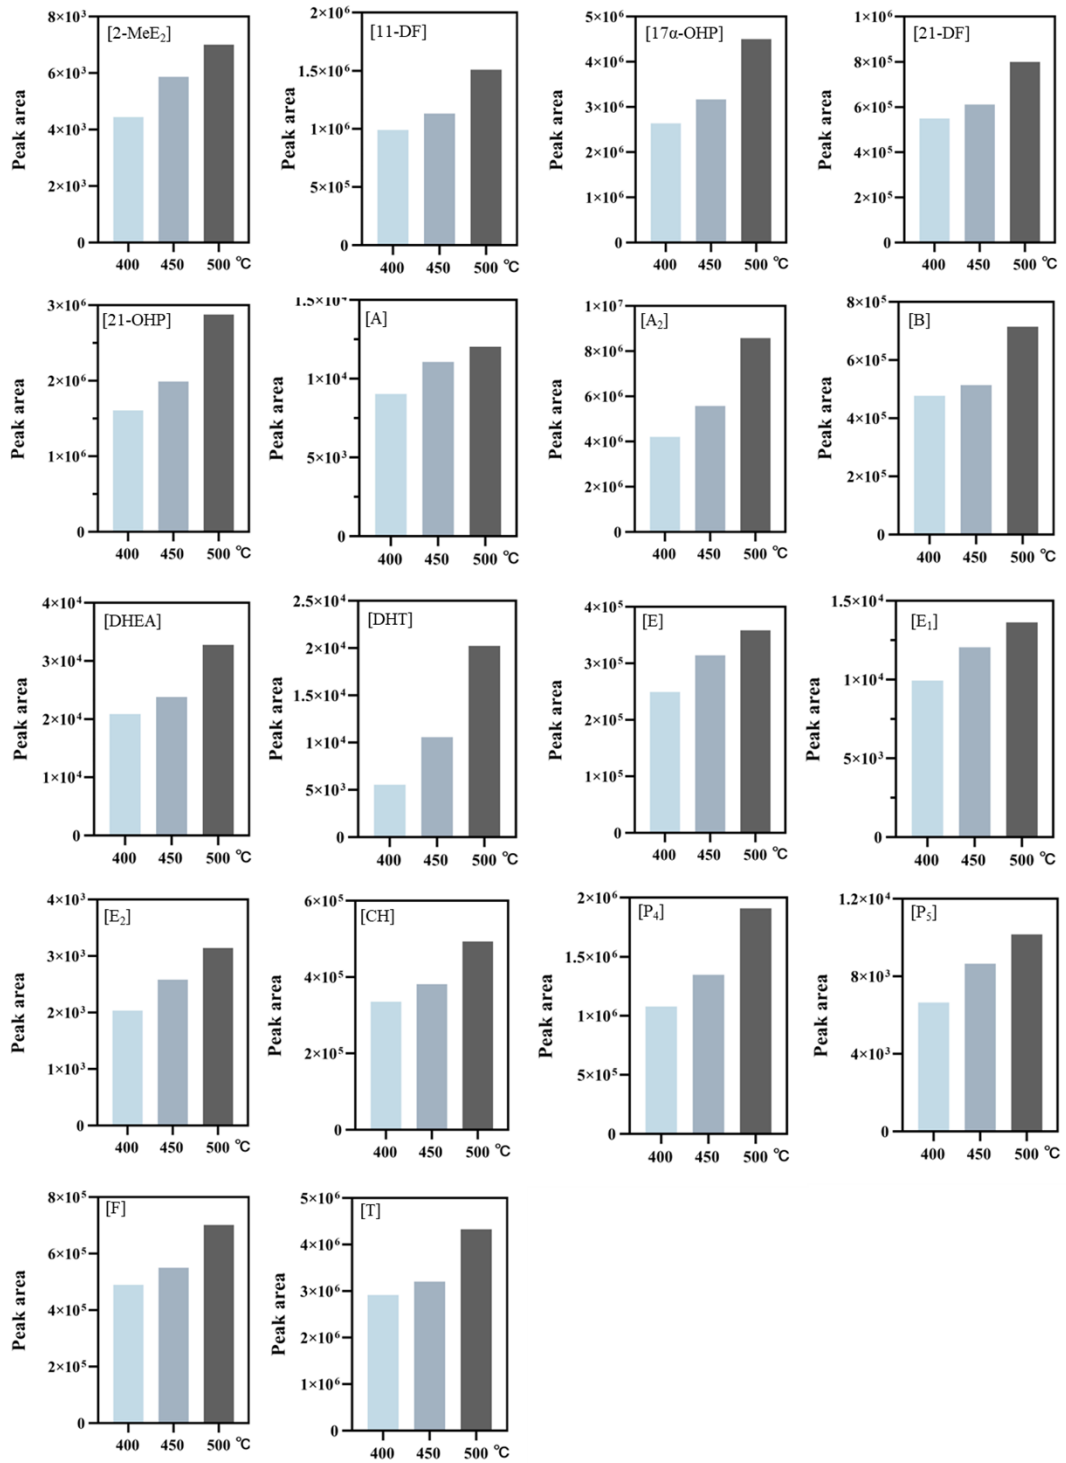

**Fig.S2** Effect of different desolvation temperatures on steroid hormone response



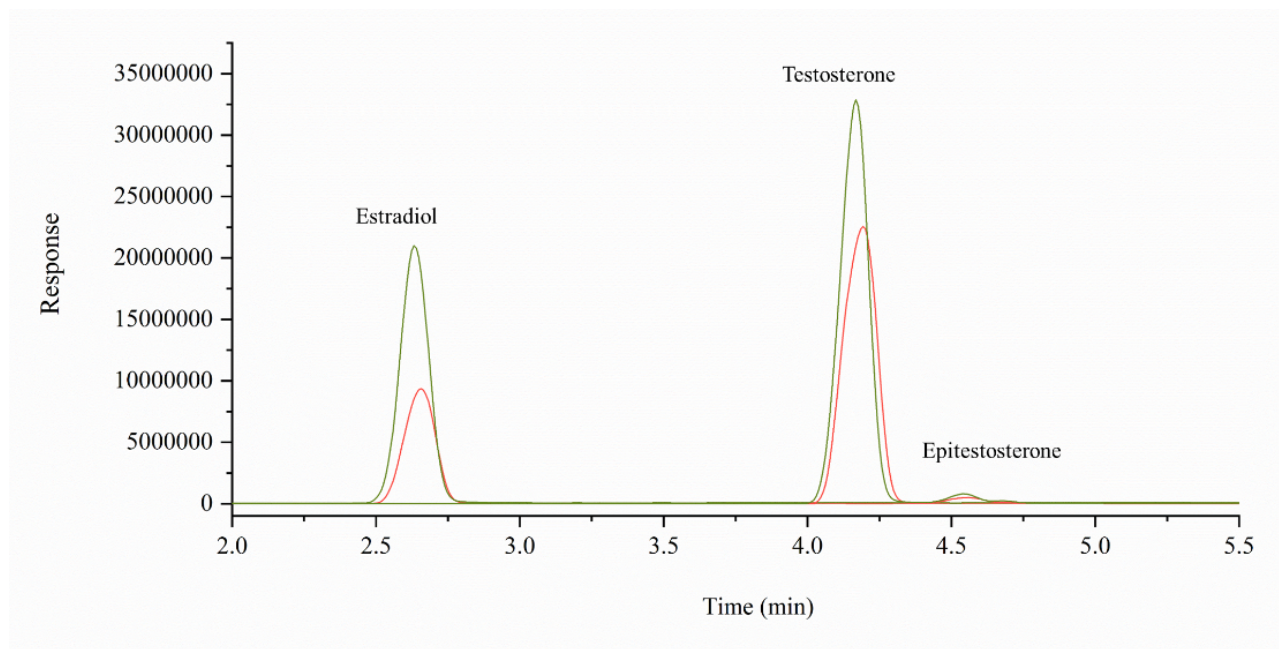

**Fig. S3** The MRM chromatogram of E<sub>2</sub> and T with different mobile phases. 0.1 mM NH<sub>4</sub>F + ACN (green peaks); pure water + ACN (red peaks)

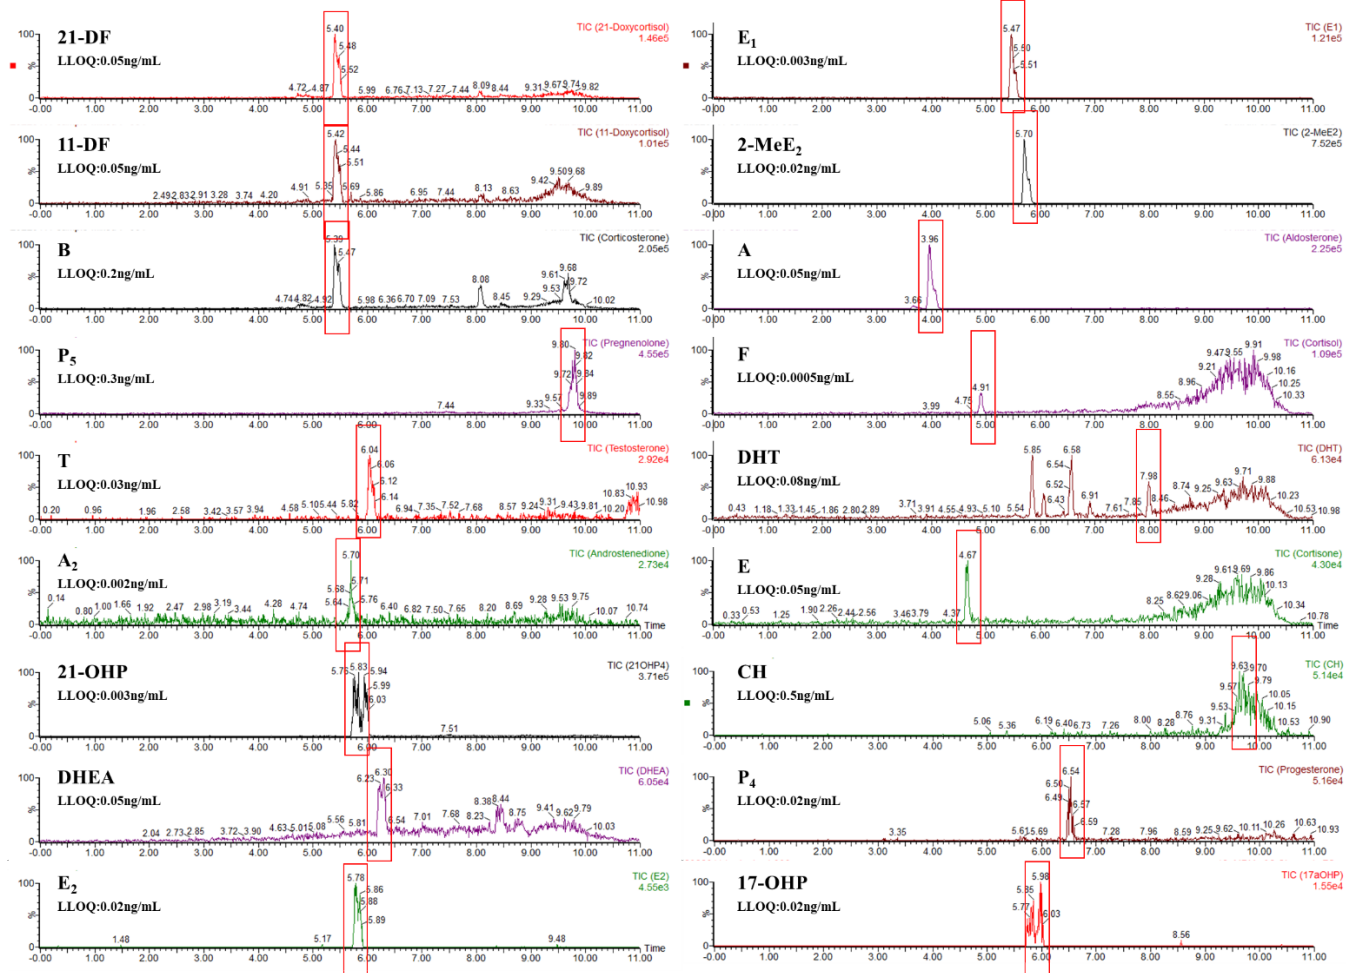

Fig.S4 LC-MS chromatograms of the 18 steroids at LLOQ included in the method.
